# Supplementary material for: Silencing of toxic gene expression by Fis
Source: PubMed Central journal article supplement — Nucleic Acids Res. 2012 Jan 28;40(10):4358–67. doi: 10.1093/nar/gks037 (PMC3378877; doi:10.1093/nar/gks037), 2012-01-28
Supplement: supp_gks037_nar-03191-v-2011-File010.pdf [file supp_gks037_nar-03191-v-2011-File010.pdf]

## SUPPLEMENTARY DATA

### Silencing of toxic gene expression by Fis

Shweta Karambelkar<sup>1</sup>, Ganduri Swapna<sup>1</sup> and Valakunja Nagaraja<sup>1\*§</sup>

<sup>1</sup>Department of Microbiology and Cell Biology, Indian Institute of Science, Bangalore 560012, India and \*Jawaharlal Nehru Centre for Advanced Scientific Research, Bangalore 560012, India

<sup>§</sup>To whom correspondence should be addressed: V. Nagaraja, Department of Microbiology and Cell Biology, Indian Institute of Science, Bangalore- 560012, India. Tel: +91-80-23600668, Fax: +91-80-23602697

**E-mail:** [vraj@mcb1.iisc.ernet.in](mailto:vraj@mcb1.iisc.ernet.in)

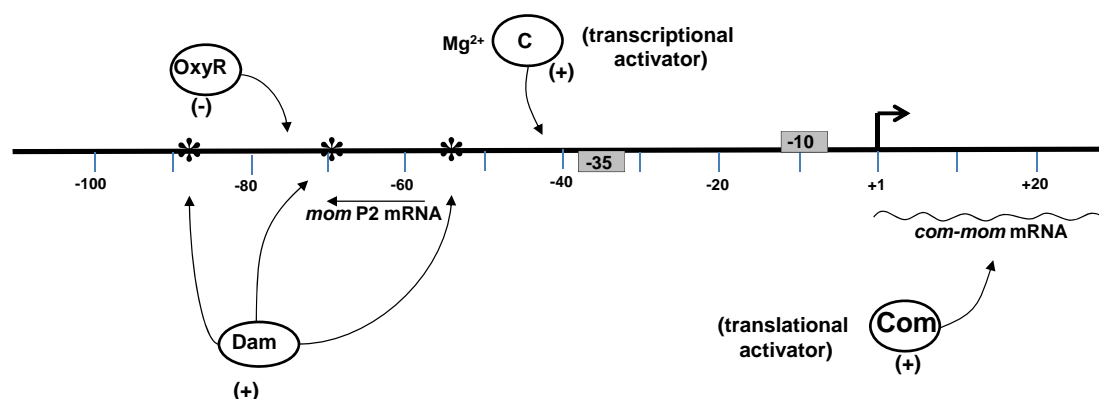

**Supplementary Figure S1. Factors regulating expression of the *mom* operon.** At the transcriptional level, expression of *mom* is governed by interplay between host factors Dam and OxyR. Asterisks depict the sites recognised by Dam. Several intrinsic features of *mom* promoter (see text) make it a weak promoter. The phage protein C acts as a transcriptional activator of *mom*.  $Mg^{2+}$  is essential for the activity of C protein. Further, at the level of translation, phage protein Com is required to melt the secondary structure in *com-mom* mRNA that occludes the *mom* start codon.

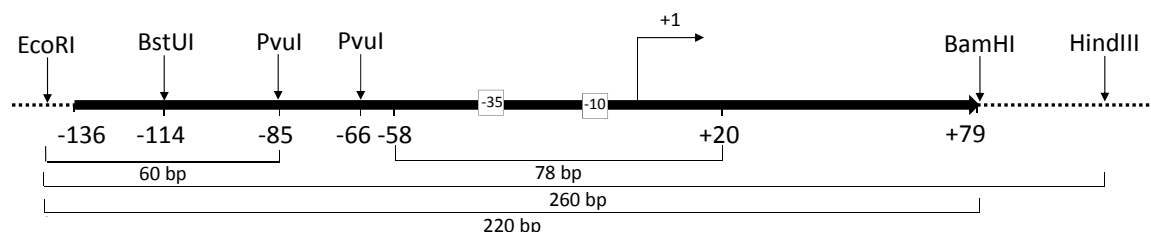

**Supplementary figure S2. Schematic depiction of *mom* promoter fragments used in the study.**  $P_{mom}$  (from positions -136 to +79 relative to the +1 start site) (thick line) has been cloned between EcoRI and BamHI sites of pUC19 to generate the plasmid pUW4. The dashed lines on either side denote vector-specific regions. The -35 and -10 promoter elements are boxed and the *mom* transcription start site indicated. Relevant restriction sites are depicted by arrows. All nucleotide positions are with respect to the +1 start site. Brackets mark the boundaries of various promoter fragments used in the study.

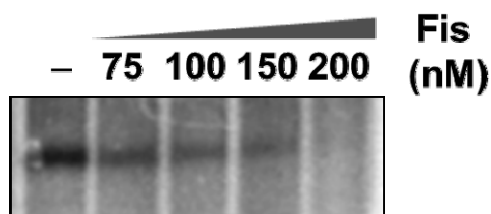

**Supplementary Figure S3. Repression of *mom* transcription by Fis.** Multiple round transcription of the linear  $P_{mom}$  fragment (-136 to +79) was carried out in the presence of increasing concentrations of Fis. 40 nM  $P_{mom}$  template DNA, 100 nM RNAP, 300 nM C and indicated concentrations of Fis were used.

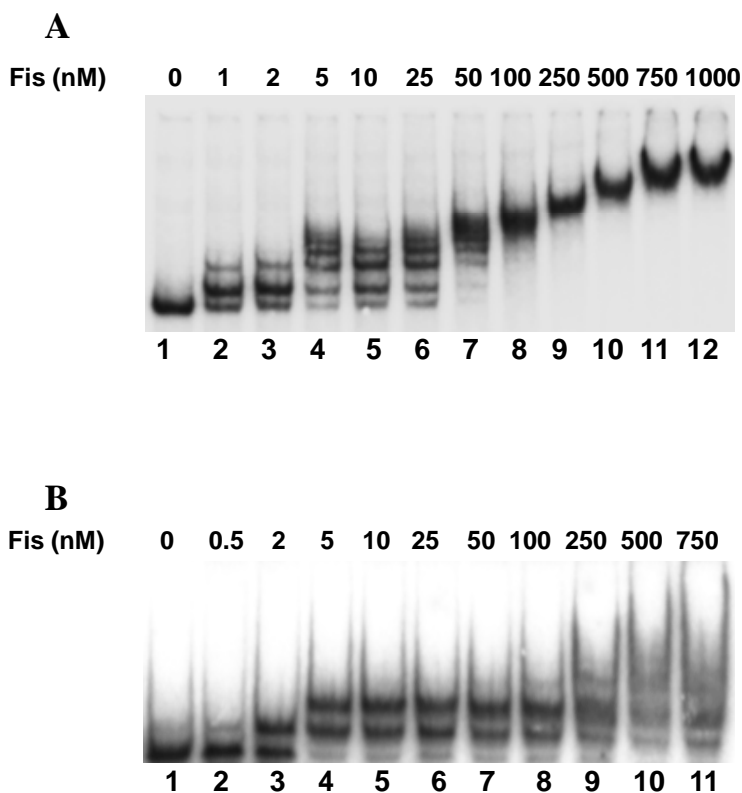

**Supplementary Figure S4. EMSA of  $P_{mom}$  with purified Fis.** Full length  $P_{mom}$  (-136 to +79, obtained from EcoRI-BamHI digestion of pUW4) (**A**) and 60 bp  $P_{mom}$  fragment (positions -136 to -85) (**B**) were incubated with increasing concentrations of Fis as indicated. EMSA was performed as described in Materials and Methods.

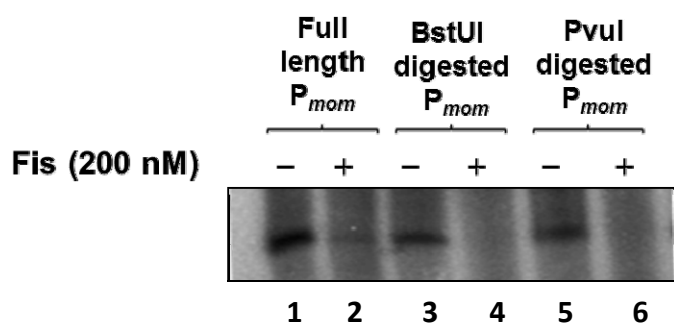

**Supplementary Figure S5. Effect of Fis on *in vitro* transcription from various  $P_{mom}$  fragments.** Multiple round transcription reactions using the full length  $P_{mom}$  transcription template (-136 to +79, lanes 1 and 2) and templates digested with BstUI (-114 to +79, lanes 3 and 4) and PvuI (-66 to +79, lanes 5 and 6) were carried out in the absence or presence Fis. 40 nM template DNA, 100 nM RNAP and 300 nM C were used.

**Supplementary Table 1. Strains and plasmids used in this study**

| Strains                      | Characteristics                                                                                                                               | Reference                                        |
|------------------------------|-----------------------------------------------------------------------------------------------------------------------------------------------|--------------------------------------------------|
| <i>E. coli</i> MG1655        | $F^- \lambda^- ilvG^- rfb^- 50 rph^- 1$                                                                                                       | laboratory stock                                 |
| BW25113                      | <i>rrnB3</i> $\Delta$ <i>lacZ4787</i> <i>hsdR514</i> $\Delta$ ( <i>araBAD</i> ) <i>567</i> $\Delta$ ( <i>rhaBAD</i> ) <i>568</i> <i>rph-1</i> | 30, <i>E. coli</i> Genetic Stock Center          |
| JW3229-1                     | <i>fis</i> <sup>-</sup> derivative of BW25113                                                                                                 | 30, <i>E. coli</i> Genetic Stock Center          |
| BL21(DE3)                    | $F^- ompT hsdS_B(r_B^- m_B^-)$ <i>gal dcm</i> (DE3)                                                                                           | laboratory stock                                 |
| W3110                        | $F^- \lambda^- mcrA mcrB$                                                                                                                     | 23, a kind gift from Prof. Georgi Muskhelishvili |
| DH10B                        | $\Delta$ ( <i>mrr-hsd rms-mcrBC</i> ) <i>mcrA recA1</i>                                                                                       | laboratory stock                                 |
| CSH50                        | <i>ara</i> $\Delta$ ( <i>lac pro</i> ) <i>thi rpsL</i>                                                                                        | 28, a kind gift from Prof. Georgi Muskhelishvili |
| CSH50 <i>fis::kan</i>        | <i>fis</i> <sup>-</sup> derivative of CSH50                                                                                                   | 29, a kind gift from Prof. Georgi Muskhelishvili |
| <b>Plasmids</b>              |                                                                                                                                               |                                                  |
| pUHE25–2 <i>fis</i>          | <i>fis</i> gene under the tightly regulated <i>lac</i> promoter pA1–04/03                                                                     | 22                                               |
| pVR7                         | C under T7 promoter in pET11d                                                                                                                 | 20                                               |
| pUW4 <i>mom</i>              | 220 bp <i>mom</i> promoter fragment cloned between EcoRI-BamHI sites of pUC19                                                                 | 20                                               |
| pUW4 <i>tin7</i>             | 220 bp <i>tin7</i> promoter fragment cloned between EcoRI-BamHI sites of pUC19                                                                | 20, 26                                           |
| pVN184                       | C under <i>tet</i> promoter in pACYC184                                                                                                       | 19                                               |
| pLW4 <i>tin7</i>             | Fusion of P <sub><i>tin7</i></sub> (-136 to +79) to <i>lacZ</i>                                                                               | 19                                               |
| pLW4 <i>tin7</i> FBS-49-38   | Same as pLW4 <i>tin7</i> except that Fis binding sites centered at -49 and -38 disrupted                                                      | This study                                       |
| pLW4 <i>tin7</i> FBS+3       | Same as pLW4 <i>tin7</i> except that Fis binding site centered at +3 disrupted                                                                | This study                                       |
| pLW4 <i>tin7</i> FBS-49-38+3 | Same as pLW4 <i>tin7</i> except that Fis binding sites centered at -49 and -38 and +3 disrupted                                               | This study                                       |

**Supplementary Table 2. Oligonucleotides used for generating mutagenic megaprimers.**

| Name of the primer | Fis binding site(s) targeted for disruption | Sequence (5' to 3')                             |
|--------------------|---------------------------------------------|-------------------------------------------------|
| WTFwd              | -                                           | CGGTAATACAGATCGATTATGCCCAATAACCACACTCAACCCATG   |
| FBS-49-38Fwd       | -49 and -38                                 | CGGTAATACATATCGATTATGCCCAATAACCACAGTCAACCCATG   |
| WTRev              | -                                           | TGATTTTCATCTCACCTCCTTTGCATCAATTCGCCACTATCTTAACA |
| FBS+3Rev           | +3                                          | TGATTTTCATCTCACCTCCTTTCCATCAATTCGCCAATATCTTAACA |

The G and C residues located at -7 and +7, relative to the center of the core Fis binding site were targeted for mutation to disrupt the Fis binding site. For disrupting Fis binding sites centered at -49 and -38, the primers FBS-49-38Fwd and WTRev were used whereas for disrupting the Fis binding site at +3, WTFwd and FBS+3Rev primers were used. All the three Fis binding sites at -49, -38 and +3 were mutated using FBS-49-38Fwd and FBS+3Rev. Mutated residues are highlighted.

**Supplementary Table 3. *In vivo* effect of disrupting Fis binding sites on Fis mediated transcriptional repression**

| pLW4 mutants | Description                                              | Genotype (CSH50 <i>fis</i> <sup>-</sup> /wild-type) | $\beta$ -galactosidase activity (Miller units) | Fold repression* |
|--------------|----------------------------------------------------------|-----------------------------------------------------|------------------------------------------------|------------------|
| wild-type    | All Fis binding sites intact                             | <i>fis</i> <sup>-</sup>                             | 2306.4                                         | <b>4.46</b>      |
|              |                                                          | wild-type                                           | 517.7                                          |                  |
| FBS-49-38    | Fis binding sites centered at -49 and -38 mutated        | <i>fis</i> <sup>-</sup>                             | 1309                                           | <b>2.34</b>      |
|              |                                                          | wild-type                                           | 559.6                                          |                  |
| FBS+3        | Fis binding site centered +3 mutated                     | <i>fis</i> <sup>-</sup>                             | 2418                                           | <b>2.46</b>      |
|              |                                                          | wild-type                                           | 981.3                                          |                  |
| FBS-49-38+3  | Fis binding sites centered at -49 and -38 and +3 mutated | <i>fis</i> <sup>-</sup>                             | 691                                            | <b>1.07</b>      |
|              |                                                          | wild-type                                           | 645.2                                          |                  |

\*Fold repression is defined as the ratio of  $\beta$ -galactosidase activity produced by a construct (pLW4*tin7* wild-type or mutants) in *fis*<sup>-</sup> (CSH50 *fis*<sup>-</sup>) background to that produced in isogenic *fis*<sup>+</sup> (CSH50 wild-type) background strain.
